# Supplementary material for: Reversible iodine absorption of nonporous coordination polymer Cu(TCNQ)
Source: Royal Society of Chemistry journal article supplement (doi:10.1039/c3nj01290e), 2013-11-28
Supplement: c3nj01290e.pdf [file c3nj01290e.pdf]

## Supporting Information

### Reversible iodine absorption of nonporous coordination polymer Cu(TCNQ)

Koji Miyao,<sup>a</sup> Akira Funabiki,<sup>a</sup> Kazuyuki Takahashi,<sup>a</sup> Tomoyuki Mochida,<sup>\*a</sup> Mikio Uruichi<sup>b</sup>

<sup>a</sup>Department of Chemistry, Graduate School of Science, Kobe University, Kobe, Hyogo 657-8501, Japan. E-mail: tmochida@platinum.kobe-u.ac.jp

<sup>b</sup>Institute for Molecular Science, Okazaki, Aichi 444-8585, Japan

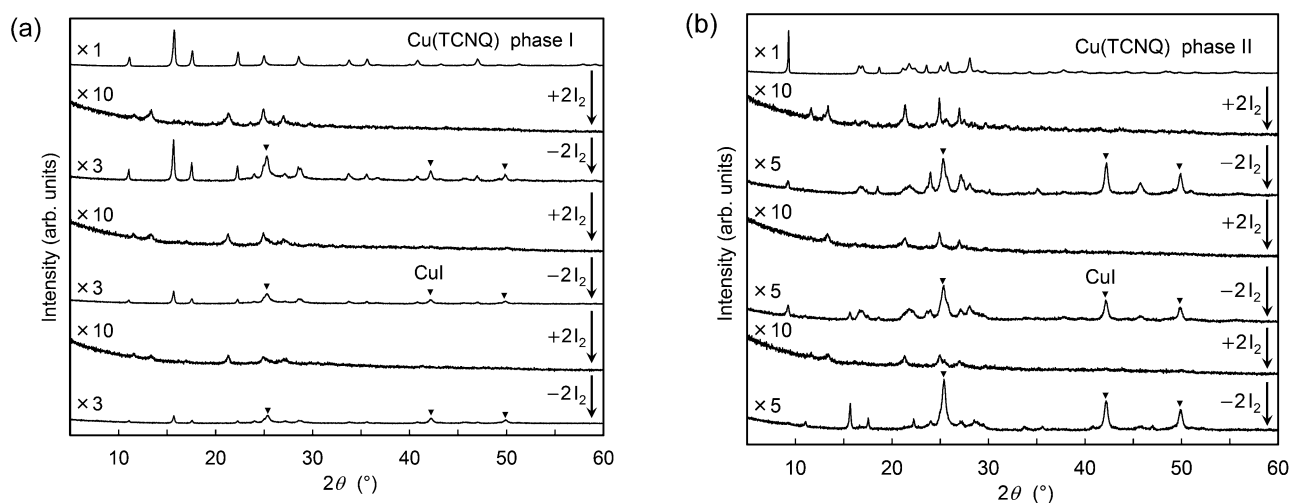

**Fig. S1** Powder XRD patterns of (a) phase I and (b) phase II Cu(TCNQ) in the repeated absorption–desorption experiments. Triangles indicate peaks for CuI.

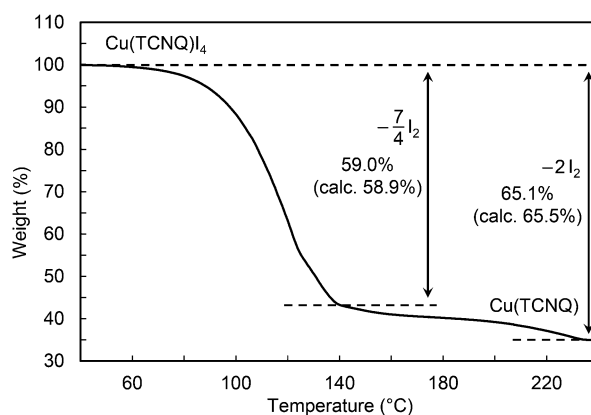

**Fig. S2** Thermogravimetric traces of Cu(TCNQ)I<sub>4</sub> prepared by solid-state reactions of phase II Cu(TCNQ).

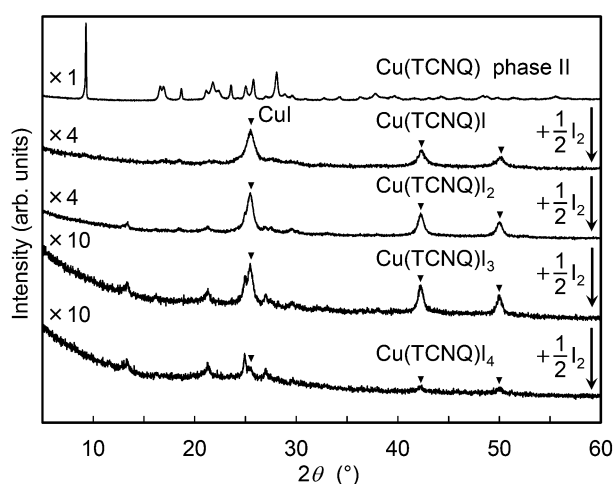

**Fig. S3** Powder XRD patterns of  $\text{Cu(TCNQ)I}_n$  ( $n = 1, 2, 3$ , and  $4$ ) obtained from stepwise solid-state reactions of phase II  $\text{Cu(TCNQ)}$ . Triangles indicate peaks for  $\text{CuI}$ .

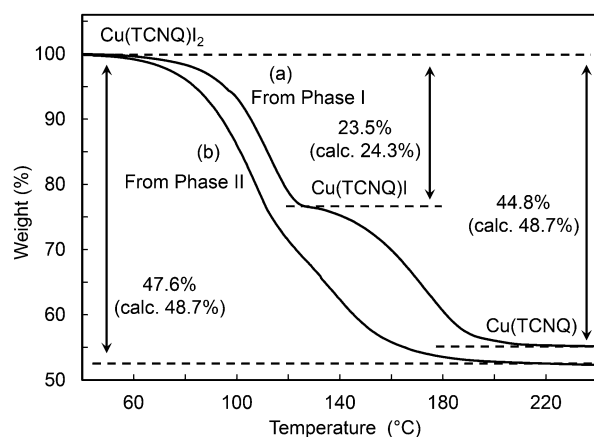

**Fig. S4** Thermogravimetric traces of  $\text{Cu(TCNQ)I}_n$  ( $n = 2$ ) formed by solid-state reactions of phase I  $\text{Cu(TCNQ)}$  and phase II  $\text{Cu(TCNQ)}$ .

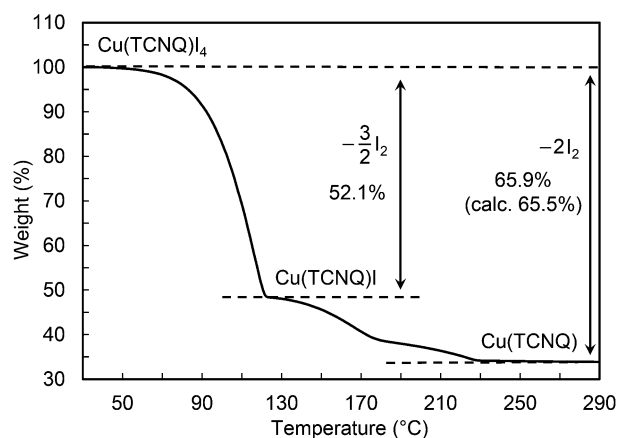

**Fig. S5** Thermogravimetric trace of  $\text{Cu(TCNQ)I}_4$  prepared by liquid-phase reaction of phase I  $\text{Cu(TCNQ)}$ .

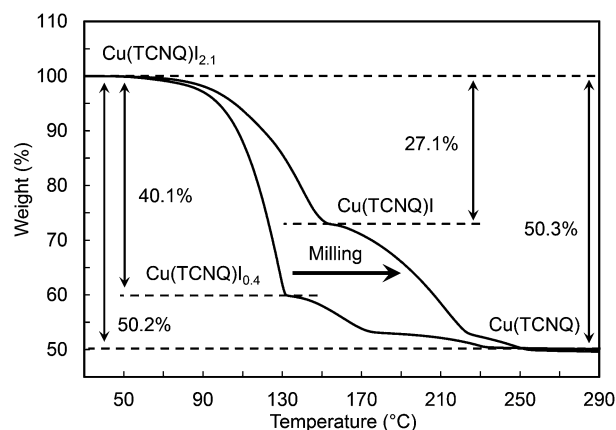

**Fig. S6** Thermogravimetric trace of  $\text{Cu}(\text{TCNQ})\text{I}_n$  ( $n = 2.1$ ) obtained from liquid-phase reaction of phase I  $\text{Cu}(\text{TCNQ})$ . TG trace after grinding phase II  $\text{Cu}(\text{TCNQ})$  sample ( $n = 2.1$ ) is also shown.

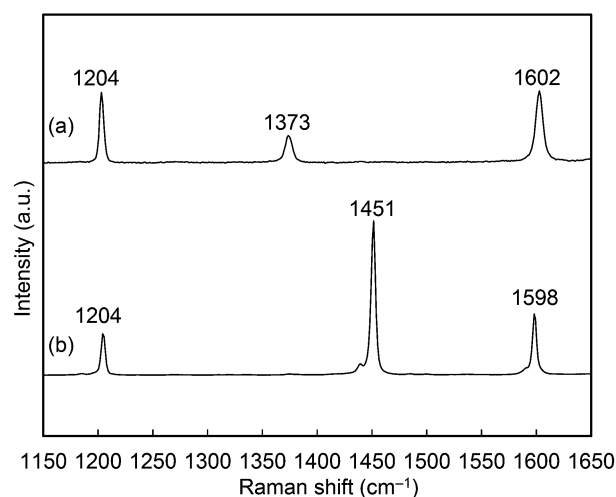

**Fig. S7** Raman spectra of (a) phase I  $\text{Cu}(\text{TCNQ})$  and (b)  $\text{Cu}(\text{TCNQ})\text{I}_4$  prepared by liquid-phase reaction of phase I.

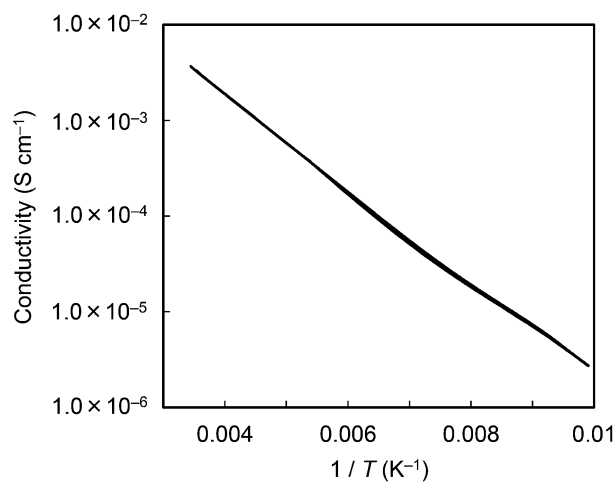

**Fig. S8** Temperature dependence of electrical conductivity of compaction pellet of  $\text{Cu}(\text{TCNQ})\text{I}_n$  ( $n = 3.7$ ) prepared from phase I  $\text{Cu}(\text{TCNQ})$  using liquid-phase reaction.
